# Supplementary material
Source: PubMed Central journal article supplement (PMC9379824)
Supplement: jamainternmed-e223355-s003.pdf [file jamainternmed-e223355-s003.pdf]

## Data Sharing Statement

Pletcher. Effectiveness of Standard vs Enhanced Self-Measurement of Blood Pressure Paired With a Connected Smartphone Application. *JAMA Intern Med.* Published August 15, 2022. doi:10.1001/jamainternmed.2022.3355

### Data

**Data available:** Yes

**Data types:** Deidentified participant data, Data dictionary

**How to access data:** Interested investigators should contact the corresponding author (MJP) at [mark.pletcher@ucsf.edu](mailto:mark.pletcher@ucsf.edu).

**When available:** With publication

### Supporting Documents

**Document types:** None

### Additional Information

**Who can access the data:** Researchers whose proposed use of the data has been approved.

**Types of analyses:** Any analysis with justified scientific value

**Mechanisms of data availability:** Analysis proposals must be approved by the PCORnet Blood Pressure Control Laboratory Steering Committee, adhere to publication policies, and sign a data use agreement.
